# Supplementary material for: Cytotoxicity and Nitric Oxide Production Inhibitory Activities of Compounds Isolated from the Plant Pathogenic Fungus Curvularia sp.
Source: MDPI journal article supplement (doi:10.3390/jof7060408), 2021-05-22
Supplement: s1 [file s1]

## Supplementary Material

Cytotoxicity and nitric oxide production inhibitory activities of compounds isolated from the plant pathogenic fungus *Curvularia* sp.

Virayu Suthiphasilp, Achara Raksat, Tharakorn Maneerat, Sarinya Hadsadee, Siriporn Jungsuttiwong, Stephen G. Pyne, Putarak Chomnunti, Wuttichai Jaidee, Rawiwan Charoensup, Surat Laphookhieo

| Content                                                                                                   | Page |
|-----------------------------------------------------------------------------------------------------------|------|
| The $^1\text{H}$ and $^{13}\text{C}$ NMR spectroscopic data of all known compounds                        | S2   |
| Figure S1. $^1\text{H}$ NMR (400 MHz, $\text{CDCl}_3$ ) of curvulariahawadride ( <b>5</b> )               | S4   |
| Figure S2. $^{13}\text{C}$ NMR (100 MHz, $\text{CDCl}_3$ ) of curvulariahawadride ( <b>5</b> )            | S4   |
| Figure S3. COSY (400 MHz, $\text{CDCl}_3$ ) of curvulariahawadride ( <b>5</b> )                           | S5   |
| Figure S4. NOESY (400 MHz, $\text{CDCl}_3$ ) of curvulariahawadride ( <b>5</b> )                          | S5   |
| Figure S5. HSQC (400 MHz, 100 MHz, $\text{CDCl}_3$ ) of curvulariahawadride ( <b>5</b> )                  | S6   |
| Figure S6. HMBC (400 MHz, 100 MHz, $\text{CDCl}_3$ ) of curvulariahawadride ( <b>5</b> )                  | S6   |
| Figure S7. HRESITOFMS spectrum of curvulariahawadride ( <b>5</b> )                                        | S7   |
| Figure S8. $^1\text{H}$ NMR (400 MHz, $\text{CDCl}_3$ ) of compound <b>1</b>                              | S7   |
| Figure S9. $^{13}\text{C}$ NMR (100 MHz, $\text{CDCl}_3$ ) of compound <b>1</b>                           | S8   |
| Figure S10. $^1\text{H}$ NMR (400 MHz, acetone- $\text{d}_6$ ) of compound <b>2</b>                       | S8   |
| Figure S11. $^{13}\text{C}$ NMR (100 MHz, acetone- $\text{d}_6$ ) of compound <b>2</b>                    | S9   |
| Figure S12. $^1\text{H}$ NMR (400 MHz, acetone- $\text{d}_6$ ) of compound <b>3</b>                       | S9   |
| Figure S13. $^{13}\text{C}$ NMR (100 MHz, acetone- $\text{d}_6$ ) of compound <b>3</b>                    | S10  |
| Figure S14. $^1\text{H}$ NMR (400 MHz, $\text{CDCl}_3$ ) of compound <b>4</b>                             | S10  |
| Figure S15. $^{13}\text{C}$ NMR (100 MHz, $\text{CDCl}_3$ ) of compound <b>4</b>                          | S11  |
| Figure S16. $^1\text{H}$ NMR (400 MHz, $\text{CDCl}_3$ ) of compound <b>6</b>                             | S11  |
| Figure S17. $^{13}\text{C}$ NMR (100 MHz, $\text{CDCl}_3$ ) of compound <b>6</b>                          | S12  |
| Figure S18. Optimized structures of compounds <b>5a-5f</b> using B3LYP/6-31G(d,p) level in methanol (PCM) | S13  |
| Figure S19. ECD spectra of compounds <b>5a-5f</b> compare with experimental ECD compound <b>5</b>         | S14  |

The  $^1\text{H}$  and  $^{13}\text{C}$  NMR spectroscopic data of all known compounds are summarized below.

Cochlioquinone N (**1**): Red needles. mp 185-187 °C;  $^1\text{H}$  NMR ( $\text{CDCl}_3$ , 400 MHz)  $\delta_{\text{H}}$  5.06 (1H, m, H-4), 4.91 (1H, d,  $J = 10.5$  Hz, H-12), 3.76 (1H, s, OH-12), 3.25 (1H, dd,  $J = 11.7$ , 2.6 Hz, H-21), 3.14 (1H, dd,  $J = 11.7$ , 3.7 Hz, H-17), 2.50 (1H, m, H-19), 2.48 (1H, m, H-5), 2.14 (1H, s, H-30), 2.10 (1H, m, H-15), 1.94 (1H, m, H-15), 1.78 (1H, m, H-16), 1.69 (1H, d,  $J = 10.5$  Hz, H-13), 1.66 (1H, m, H-20), 1.54 (1H, m, H-16), 1.42 (2H, m, H-3, H-20), 1.40 (2H, m, H-2, H-19), 1.33 (3H, s, H-26), 1.19 (3H, s, H-24), 1.17 (3H, s, H-23), 1.06 (1H, m, H-2), 1.02 (3H, s, H-25), 1.02 (3H, d,  $J = 7.3$  Hz, H-27), 0.84 (3H, t,  $J = 7.2$  Hz, H-1), and 0.78 (3H, d,  $J = 6.6$  Hz, H-28);  $^{13}\text{C}$  NMR ( $\text{CDCl}_3$ , 100 MHz)  $\delta_{\text{C}}$  183.9 (C-7), 178.7 (C-10), 169.4 (C-29), 154.2 (C-8), 144.8 (C-6), 110.9 (C-11), 85.0 (C-21), 83.7 (C-14), 83.5 (C-17), 80.6 (C-4), 71.8 (C-22), 63.1 (C-12), 51.7 (C-13), 38.6 (C-5, C-19), 37.4 (C-15), 36.7 (C-3, C-18), 26.0 (C-24), 25.1 (C-2, C-16), 23.7 (C-23), 21.5 (C-20), 21.2 (C-26), 21.0 (C-30), 15.1 (C-28), 13.7 (C-27), 12.6 (C-25), 10.9 (C-1).

Cochlioquinone A (**2**): Colorless solid. m.p. 130-132 °C;  $^1\text{H}$  NMR (acetone- $\text{d}_6$ , 400 MHz)  $\delta_{\text{H}}$  6.62 (1H, s, H-11), 4.93 (2H, m, H-4, H-12), 4.08 (1H, m, OH-12), 3.36 (1H, dd,  $J = 7.7$ , 6.1 Hz, H-5), 3.21 (2H, m, H-17, H-21), 2.48 (1H, m, H-19), 2.00 (3H, s, H-30), 1.99 (1H, m, H-15), 1.91 (1H, m, H-15), 1.69 (1H, m, H-13), 1.66 (1H, m, H-20), 1.63 (1H, m, H-3), 1.55 (1H, m, H-16), 1.49 (1H, m, H-20), 1.43 (1H, m, H-19), 1.32 (3H, s, H-26), 1.14 (3H, s, H-23), 1.13 (3H, s, H-27, H-24), 1.08 (1H, m, H-16), 1.04 (3H, s, H-25), and 0.87 (6H, m, H-1, H-28);  $^{13}\text{C}$  NMR (acetone- $\text{d}_6$ , 100 MHz)  $\delta_{\text{C}}$  188.1 (C-10), 181.4 (C-7), 169.9 (C-29), 151.2 (C-8), 147.8 (C-6), 133.9 (C-11), 119.7 (C-9), 85.4 (C-21), 83.7 (C-17), 82.6 (C-14), 79.4 (C-4), 70.8 (C-22), 62.6 (C-12), 52.1 (C-13), 38.6 (C-19), 37.4 (C-15), 36.5 (C-18), 36.1 (C-3), 32.9 (C-5), 25.1 (C-2), 24.9 (C-24), 24.8 (C-23), 23.3 (C-16), 21.2 (C-20), 20.4 (C-26), 19.9 (C-30), 17.1 (C-27), 15.1 (C-28), 12.0 (C-25), and 10.6 (C-1).

Stemphone (**3**): Yellow solid, m.p. 159-161 °C;  $^1\text{H}$  NMR (acetone- $\text{d}_6$ , 400 MHz)  $\delta_{\text{H}}$  6.54 (1H, s, H-11), 5.59 (1H, m, H-2), 5.21 (1H, d,  $J = 9.1$  Hz, H-4), 4.93 (2H, dt,  $J = 10.5$ , 2.4 Hz, H-12), 4.02 (1H, d,  $J = 2.4$  Hz, OH-12), 3.33 (1H, m, H-5), 3.24 (1H, m, H-21), 3.21 (1H, m, H-17), 2.47 (1H, m, H-19), 1.99 (1H, m, H-15), 1.89 (3H, s, H-30), 1.88 (1H, m, H-15), 1.73 (1H, m, H-16), 1.71 (1H, m, H-13), 1.66 (1H, m, H-20), 1.63 (3H, d,  $J = 7.4$  Hz, H-1), 1.60 (4H, m, H-16, H-28), 1.49 (1H, m, H-20), 1.43 (1H, m, H-19), 1.32 (3H, m, H-26), 1.13 (3H, s, H-23), 1.12 (3H, s, H-24), 1.07 (3H, s, H-25), and 1.03 (3H, d,  $J = 6.7$  Hz, H-27);  $^{13}\text{C}$  NMR (acetone- $\text{d}_6$ , 100 MHz)  $\delta_{\text{C}}$  188.0 (C-10), 181.3 (C-7), 169.0 (C-29), 151.2 (C-8), 148.2 (C-6), 132.8 (C-11), 132.5 (C-3), 124.6 (C-2), 119.7 (C-9), 85.3 (C-21), 83.7 (C-17), 82.6 (C-14), 81.2 (C-4), 70.8 (C-22), 62.6 (C-12), 52.2 (C-13), 38.6 (C-19), 37.4 (C-15), 36.5 (C-18), 25.1 (C-16), 24.9 (C-24), 24.8 (C-23), 21.2 (C-20), 20.4 (C-26), 19.9 (C-30), 16.0 (C-25), 12.2 (C-28), 12.0 (C-27), and 10.7 (C-1).

Anhydrocochlioquinone A (**4**): Red amorphous solid.  $^1\text{H}$  NMR ( $\text{CDCl}_3$ , 400 MHz)  $\delta_{\text{H}}$  6.63 (1H, s, H-11), 6.32 (1H, s, H-12), 4.93 (1H, dd,  $J = 7.5$ , 5.4 Hz, H-4), 3.40 (1H, qd,  $J = 7.5$ , 5.4 Hz, H-5), 3.19 (2H, ddd,  $J = 11.8$ , 4.8, 3.2 Hz, H-17, H-21), 2.31 (1H, dt,  $J = 13.3$ , 3.2 Hz, H-15), 2.11 (1H, m, H-19), 2.04 (4H, m, H-15, H-30), 1.82 (1H, m, H-16), 1.71 (2H, m, H-16, H-20), 1.59 (1H, m, H-20), 1.56 (3H, m, H-26), 1.55 (1H, m, H-19), 1.51 (1H, m, H-3), 1.43 (1H, m, H-2), 1.20 (3H, s, H-23), 1.18 (3H, s, H-24), 1.12 (3H, s, H-25), 1.11 (3H, m, H-27), 1.07

(1H, m, H-2), 0.85 (6H, m, H-1, H-28);  $^{13}\text{C}$  NMR ( $\text{CDCl}_3$ , 100 MHz)  $\delta_{\text{C}}$  184.9 (C-10), 181.1 (C-7), 170.6 (C-29), 148.9 (C-8), 148.3 (C-6), 147.5 (C-13), 132.9 (C-11), 117.2 (C-9), 110.5 (C-12), 84.6 (C-21), 81.5 (C-14), 81.1 (C-17), 80.0 (C-4), 71.8 (C-22), 38.6 (C-18), 37.8 (C-15), 36.4 (C-3), 34.8 (C-19), 32.5 (C-5), 27.1 (C-26), 26.1 (C-23), 24.5 (C-16), 23.9 (C-24), 23.8 (C-2), 21.7 (C-20), 20.9 (C-30), 20.2 (C-25), 18.3 (C-27), 15.4 (C-28), and 11.1 (C-1).

Terpestacin (**6**): Colorless solid. m.p. 171-172 °C;  $^1\text{H}$  NMR ( $\text{CDCl}_3$ , 400 MHz)  $\delta_{\text{H}}$  5.40 (1H, m, H-13), 5.24 (1H, m, H-7), 5.12 (1H, m, H-3), 4.06 (1H, dd,  $J = 9.5, 3.5$  Hz, H-11), 3.88 (1H, dd,  $J = 10.3, 7.0$  Hz, H-24), 3.81 (1H, dd,  $J = 10.4, 5.4$  Hz, H-24), 2.72 (1H, m, H-15), 2.65 (1H, m, H-23), 2.44 (1H, m, H-14), 2.38 (1H, m, H-2), 2.26 (1H, m, H-5), 2.25 (1H, m, H-6), 2.11 (1H, m, H-6), 2.09 (1H, m, H-9), 2.00 (1H, m, H-5), 1.90 (1H, m, H-14), 1.78 (1H, m, H-9), 1.74 (2H, m, H-10), 1.70 (1H, m, H-2), 1.64 (3H, s, H-21), 1.63 (3H, s, H-20), 1.57 (3H, s, H-22), 1.30 (3H, d,  $J = 7.1$  Hz, H-25), and 1.00 (3H, s, H-19);  $^{13}\text{C}$  NMR ( $\text{CDCl}_3$ , 100 MHz)  $\delta_{\text{C}}$  208.0 (C-18), 149.1 (C-16), 146.7 (C-17), 138.0 (C-12), 136.4 (C-4), 132.9 (C-8), 128.9 (C-13), 124.3 (C-3), 121.6 (C-7), 76.5 (C-11), 66.1 (C-24), 49.6 (C-15), 48.9 (C-1), 40.3 (C-5), 39.3 (C-2), 37.1 (C-23), 34.9 (C-9), 29.8 (C-10), 28.8 (C-14), 23.8 (C-6), 16.2 (C-19), 15.6 (C-21), 15.3 (C-20), 14.4 (C-25), and 10.4 (C-22).

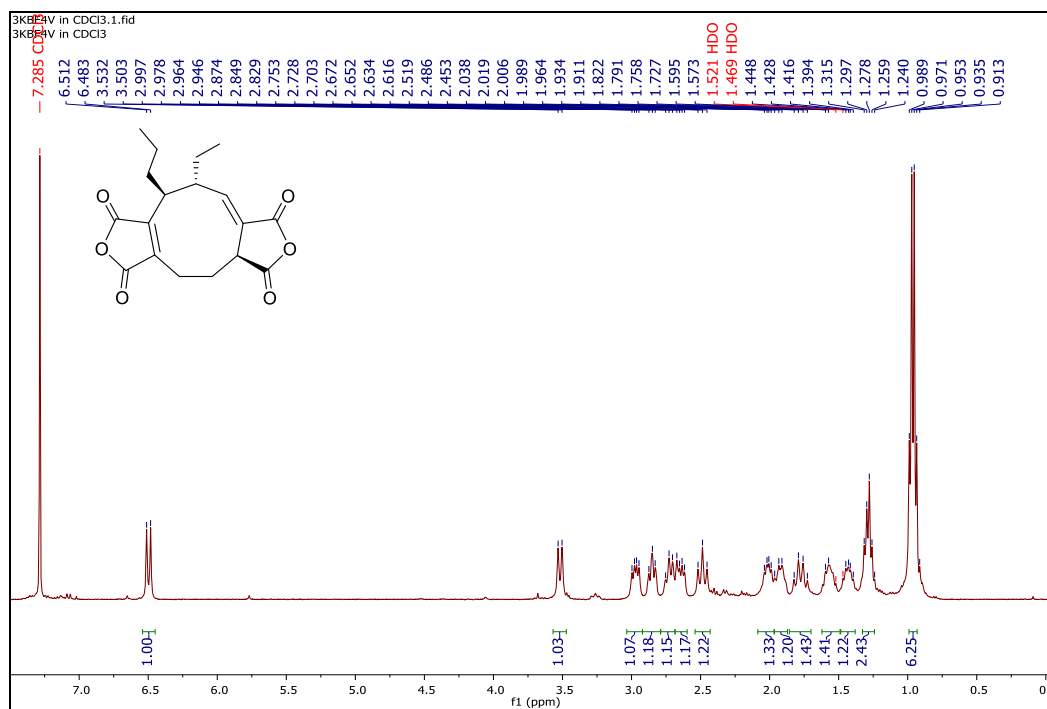

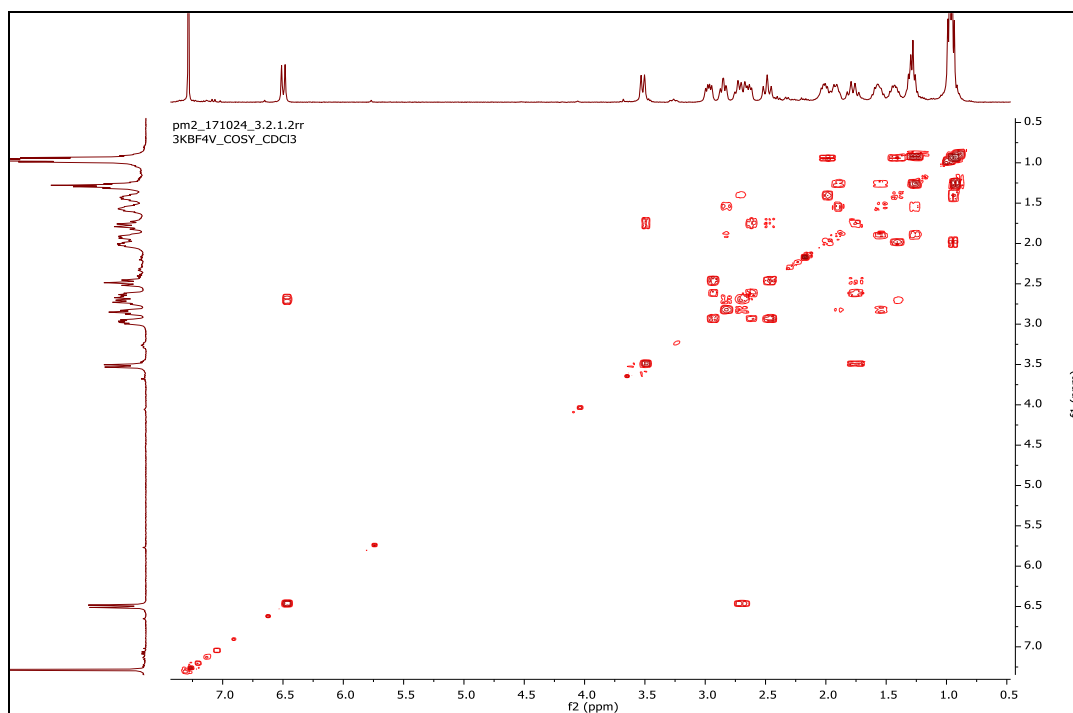

**Figure S3.** COSY (400 MHz, CDCl<sub>3</sub>) of curvulariahawadride (**5**)

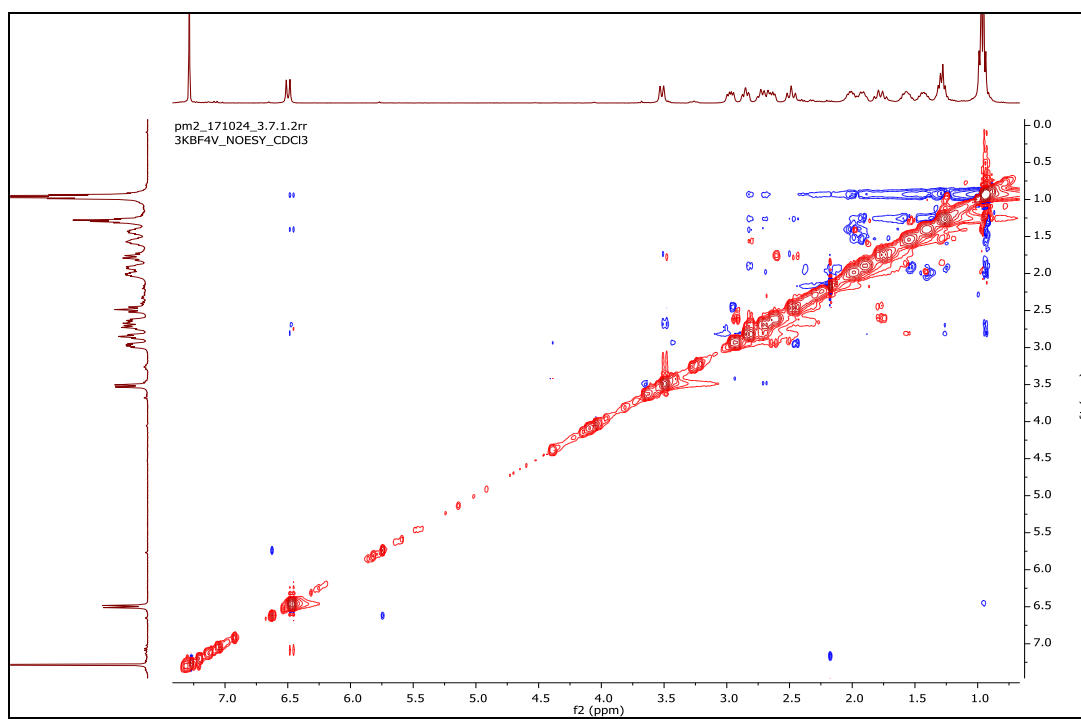

**Figure S4.** NOESY (400 MHz, CDCl<sub>3</sub>) of curvulariahawadride (**5**)

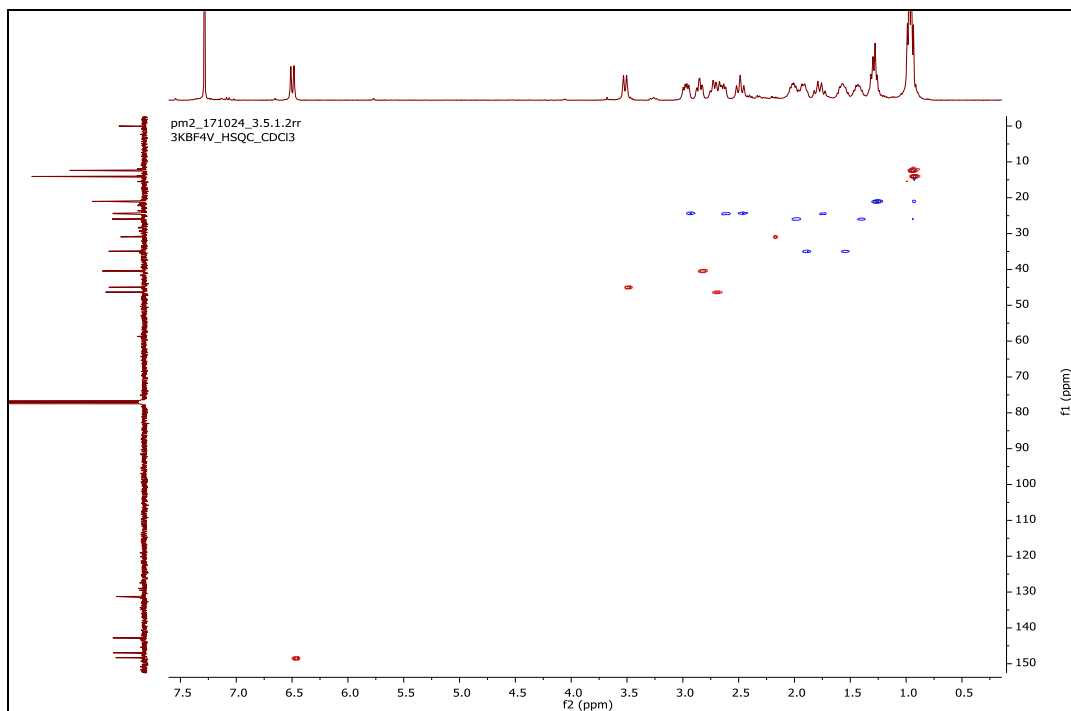

**Figure S5.** HSQC (400 MHz, 100 MHz, CDCl<sub>3</sub>) of curvulariahawadride (**5**)

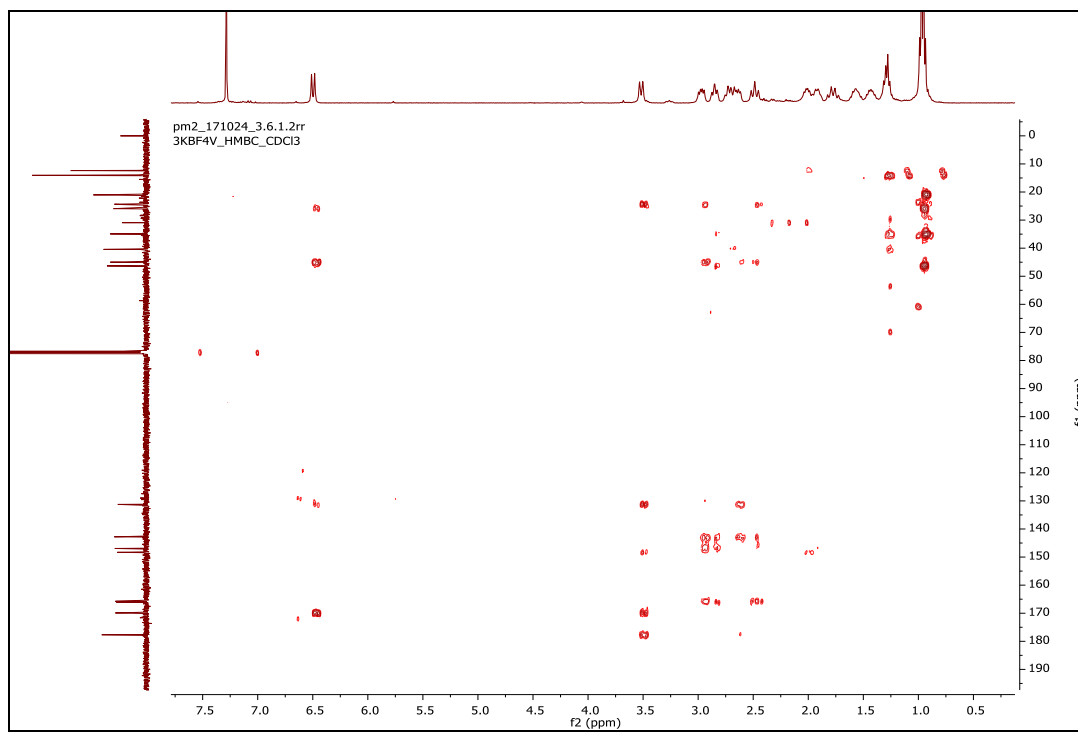

**Figure S6.** HMBC (400 MHz, 100 MHz, CDCl<sub>3</sub>) of curvulariahawadride (**5**)



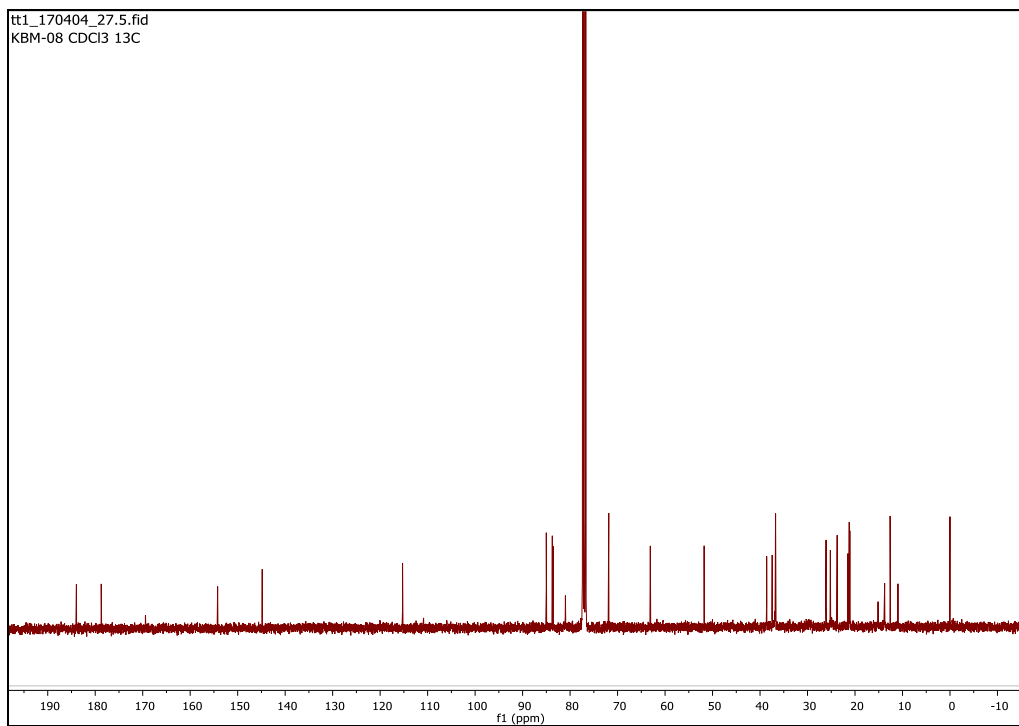

**Figure S9.** <sup>13</sup>C NMR (100 MHz, CDCl<sub>3</sub>) of compound **1**

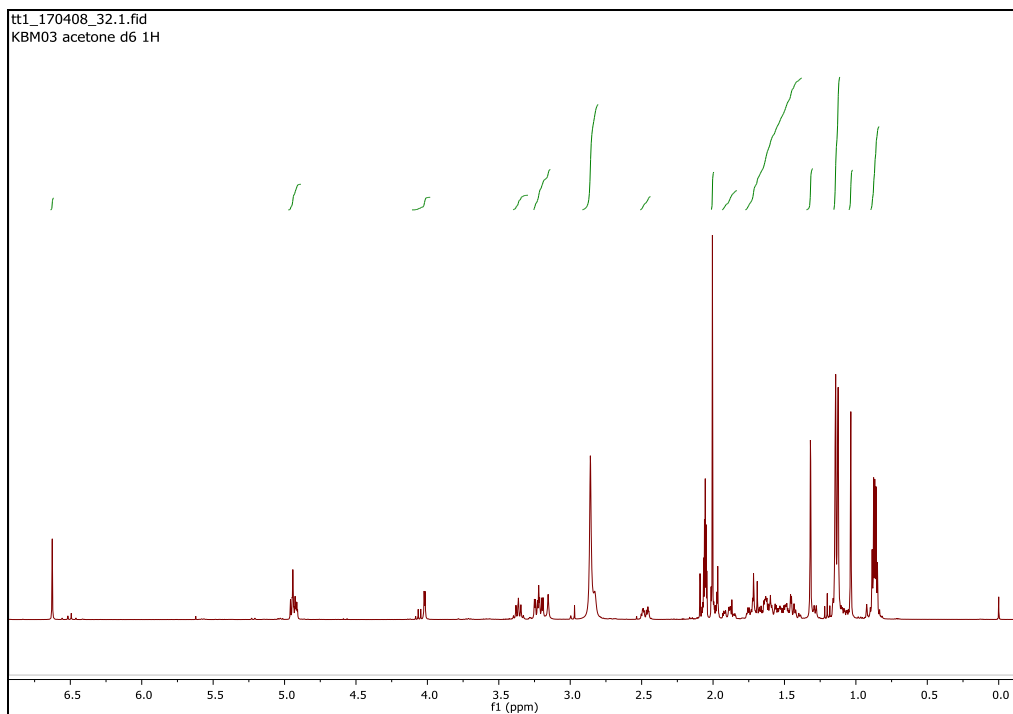

**Figure S10.** <sup>1</sup>H NMR (400 MHz, acetone-d<sub>6</sub>) of compound **2**



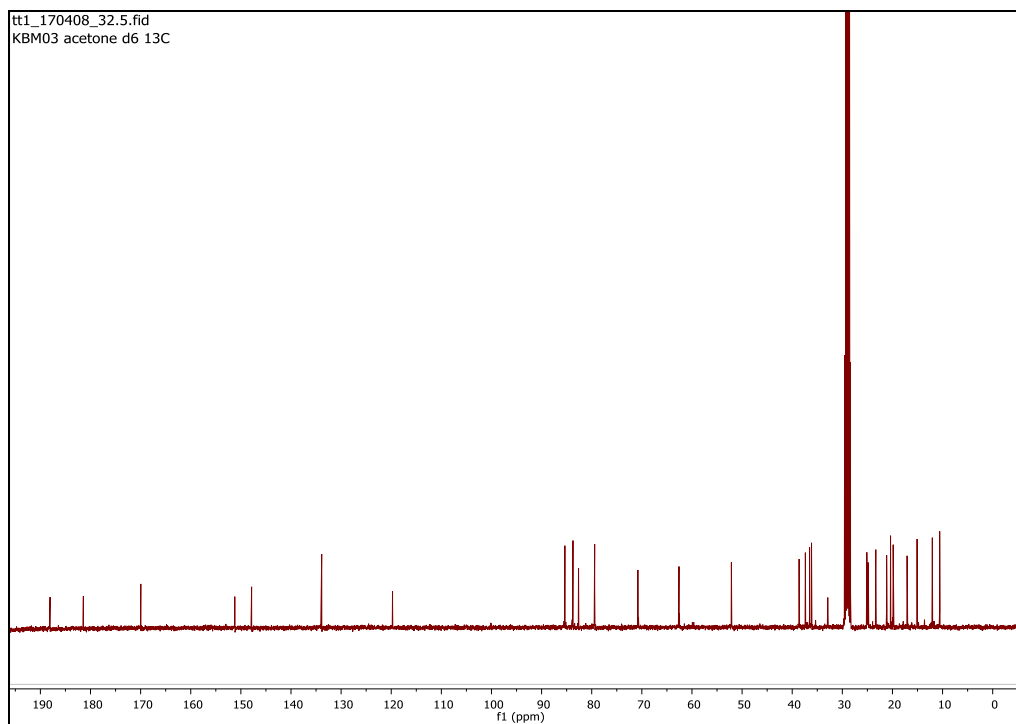

**Figure S11.**  $^{13}\text{C}$  NMR (100 MHz, acetone- $\text{d}_6$ ) of compound **2**

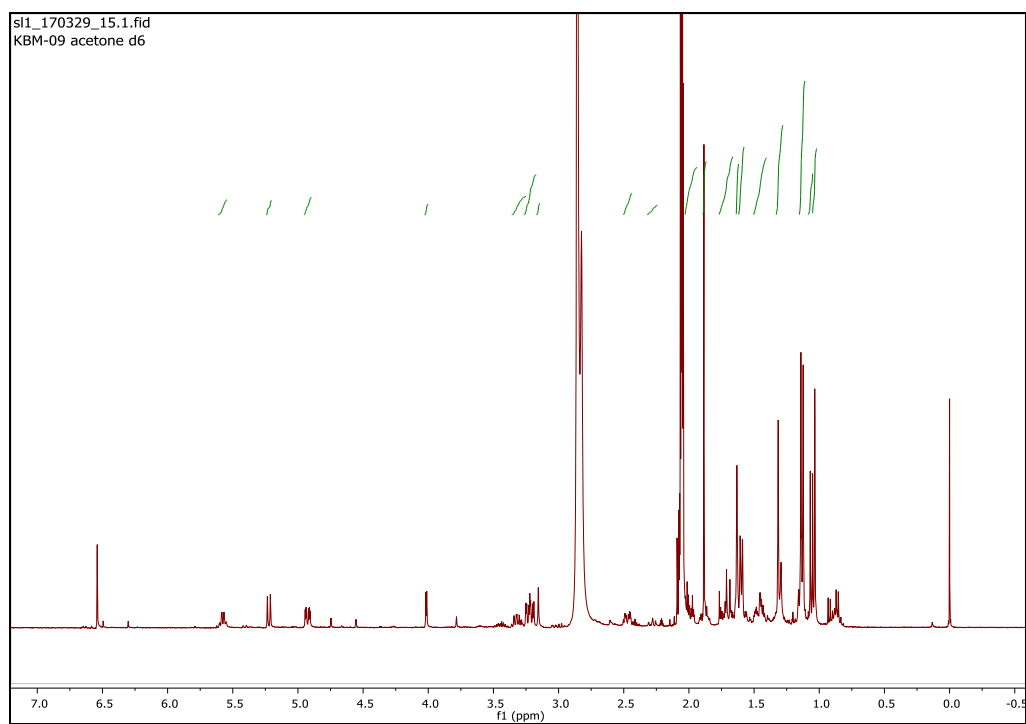

**Figure S12.**  $^1\text{H}$  NMR (400 MHz, acetone- $\text{d}_6$ ) of compound **3**

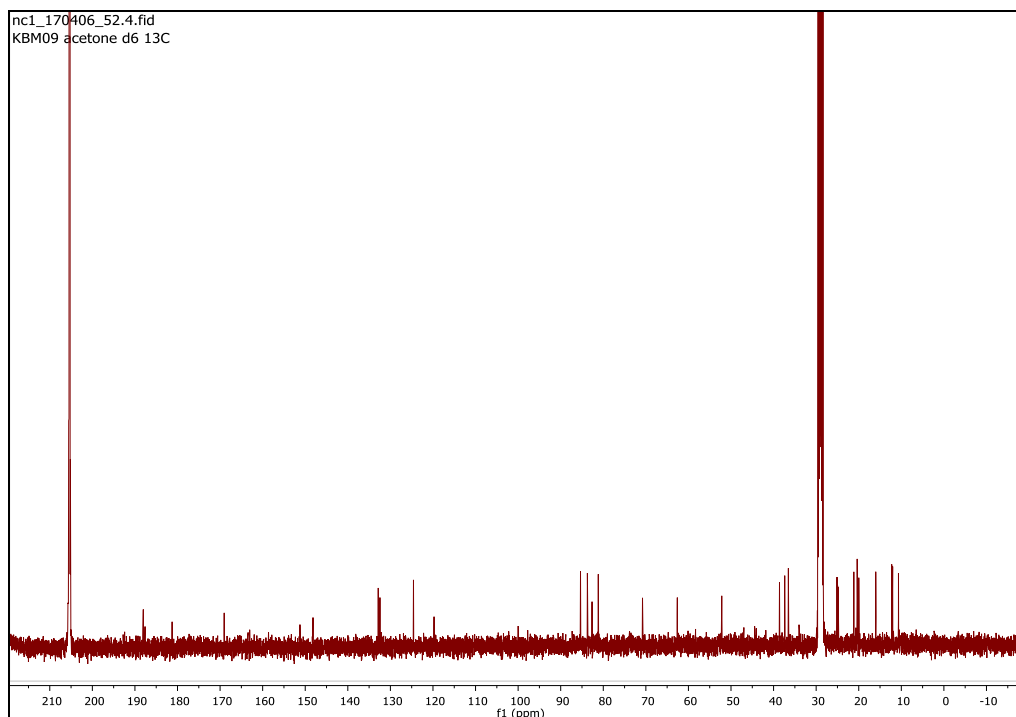

**Figure S13.**  $^{13}\text{C}$  NMR (100 MHz, acetone- $\text{d}_6$ ) of compound **3**

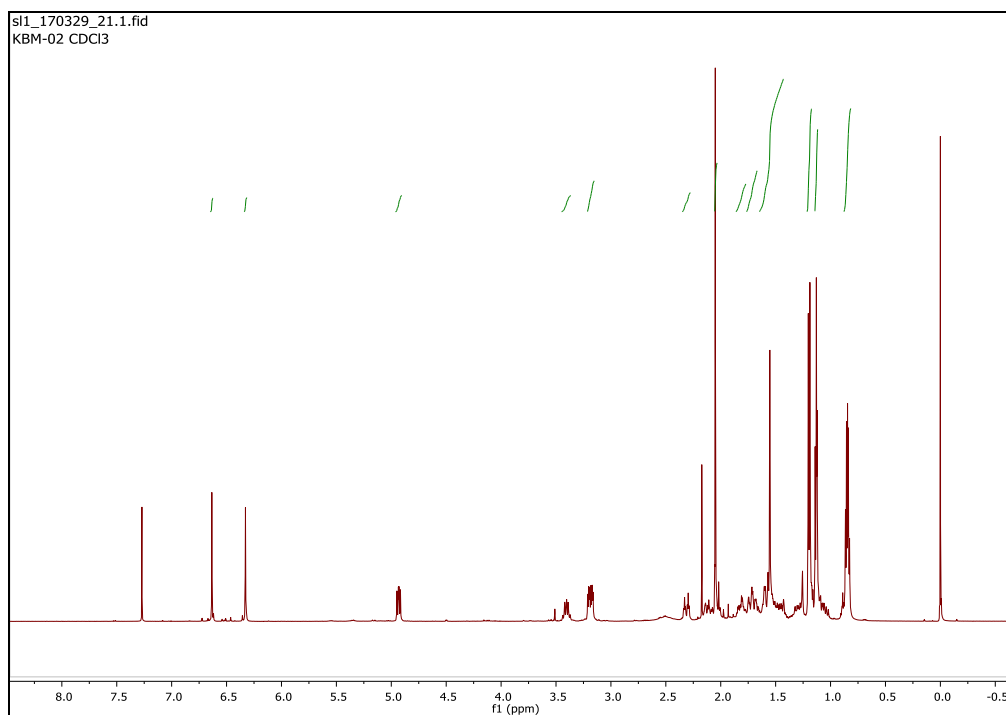

**Figure S14.**  $^1\text{H}$  NMR (400 MHz,  $\text{CDCl}_3$ ) of compound **4**

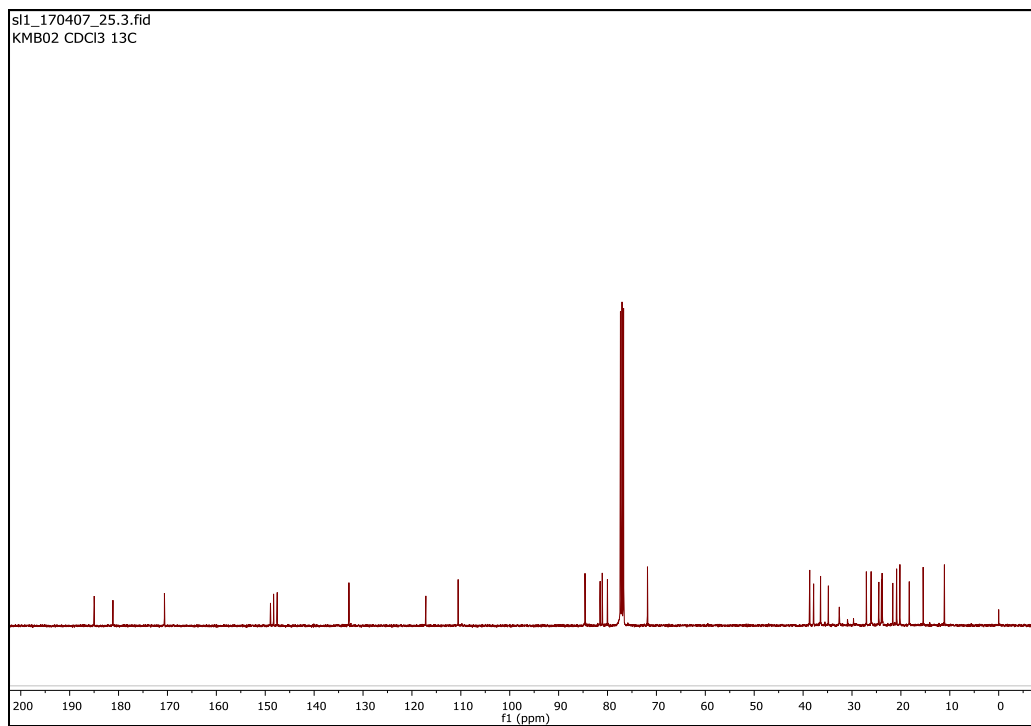

**Figure S15.** <sup>13</sup>C NMR (100 MHz, CDCl<sub>3</sub>) of compound **4**

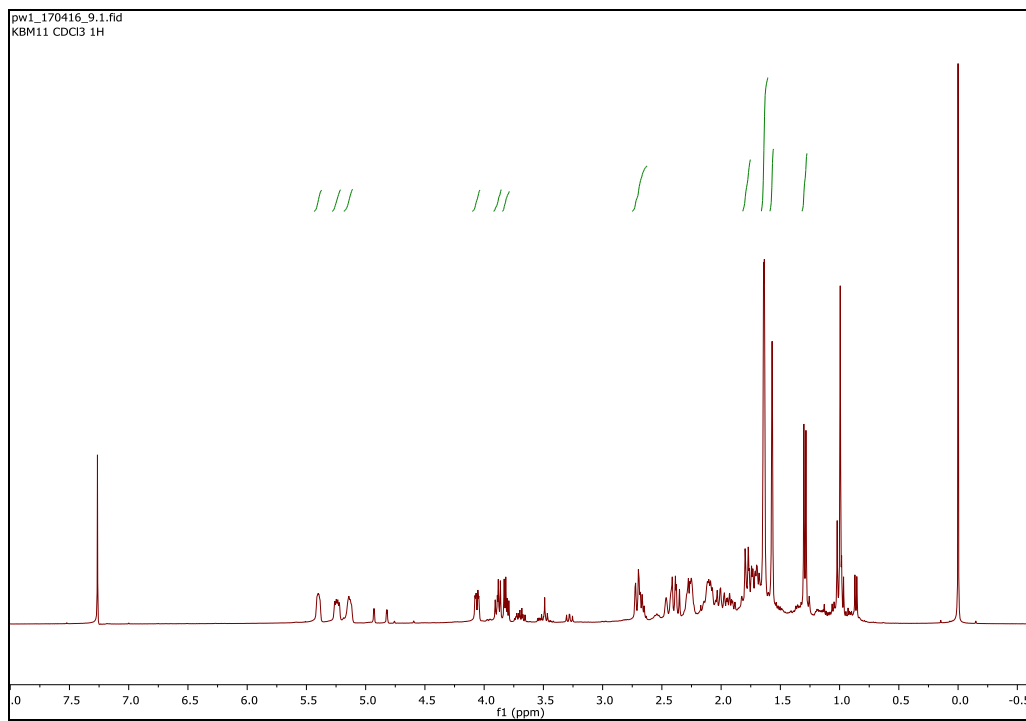

**Figure S16.** <sup>1</sup>H NMR (400 MHz, CDCl<sub>3</sub>) of compound **6**  
S11

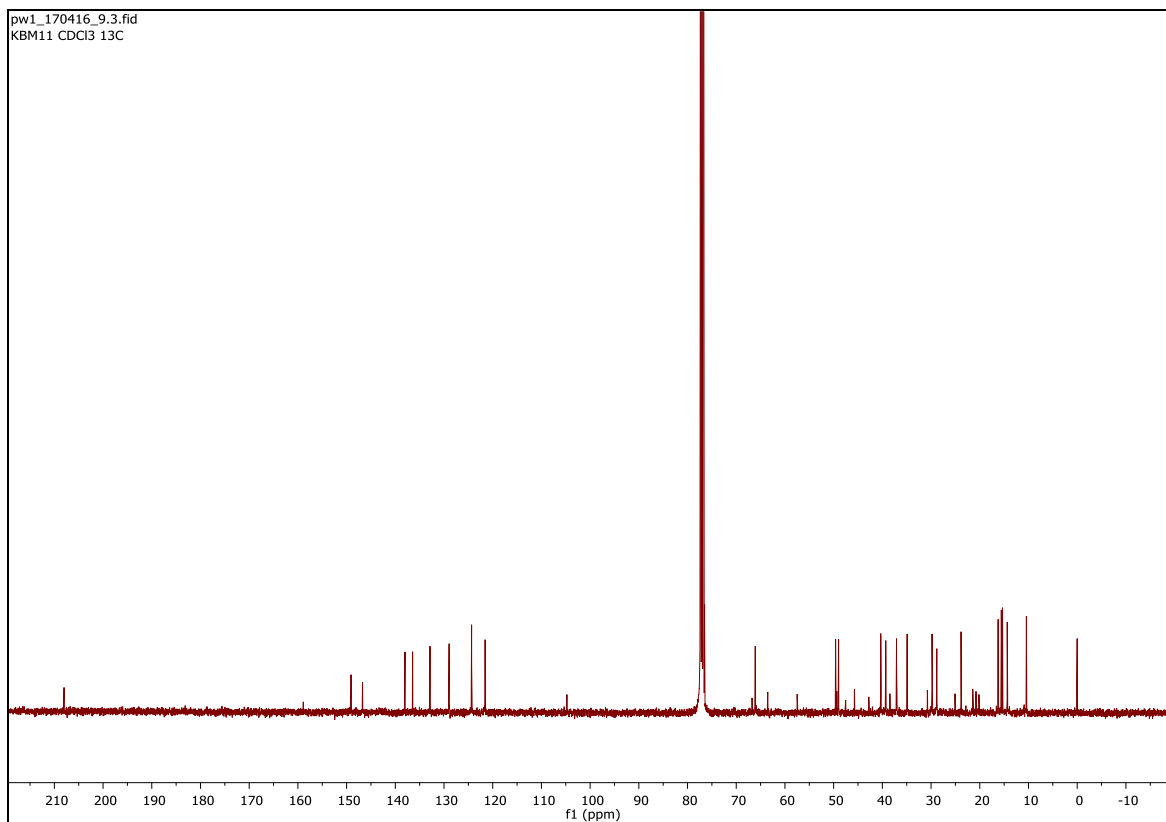

**Figure S17.** <sup>13</sup>C NMR (100 MHz, CDCl<sub>3</sub>) of compound **6**

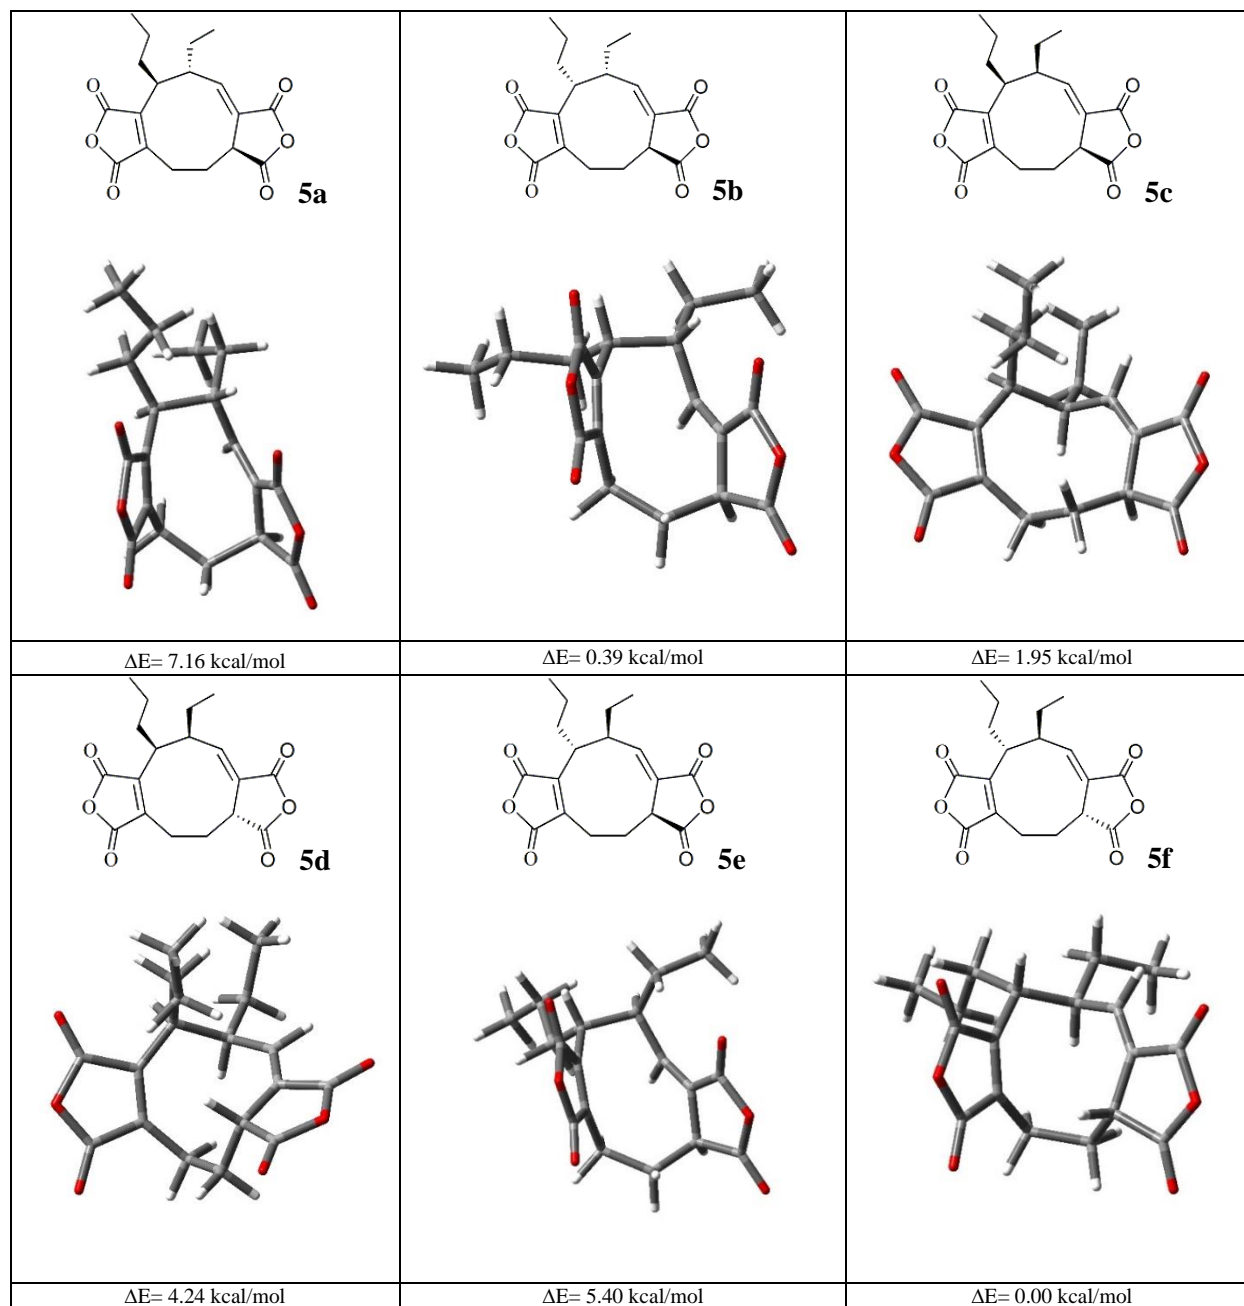

**Figure S18.** Optimized structures of compounds **5a-5f** using B3LYP/6-31G(d,p) level in methanol (PCM).

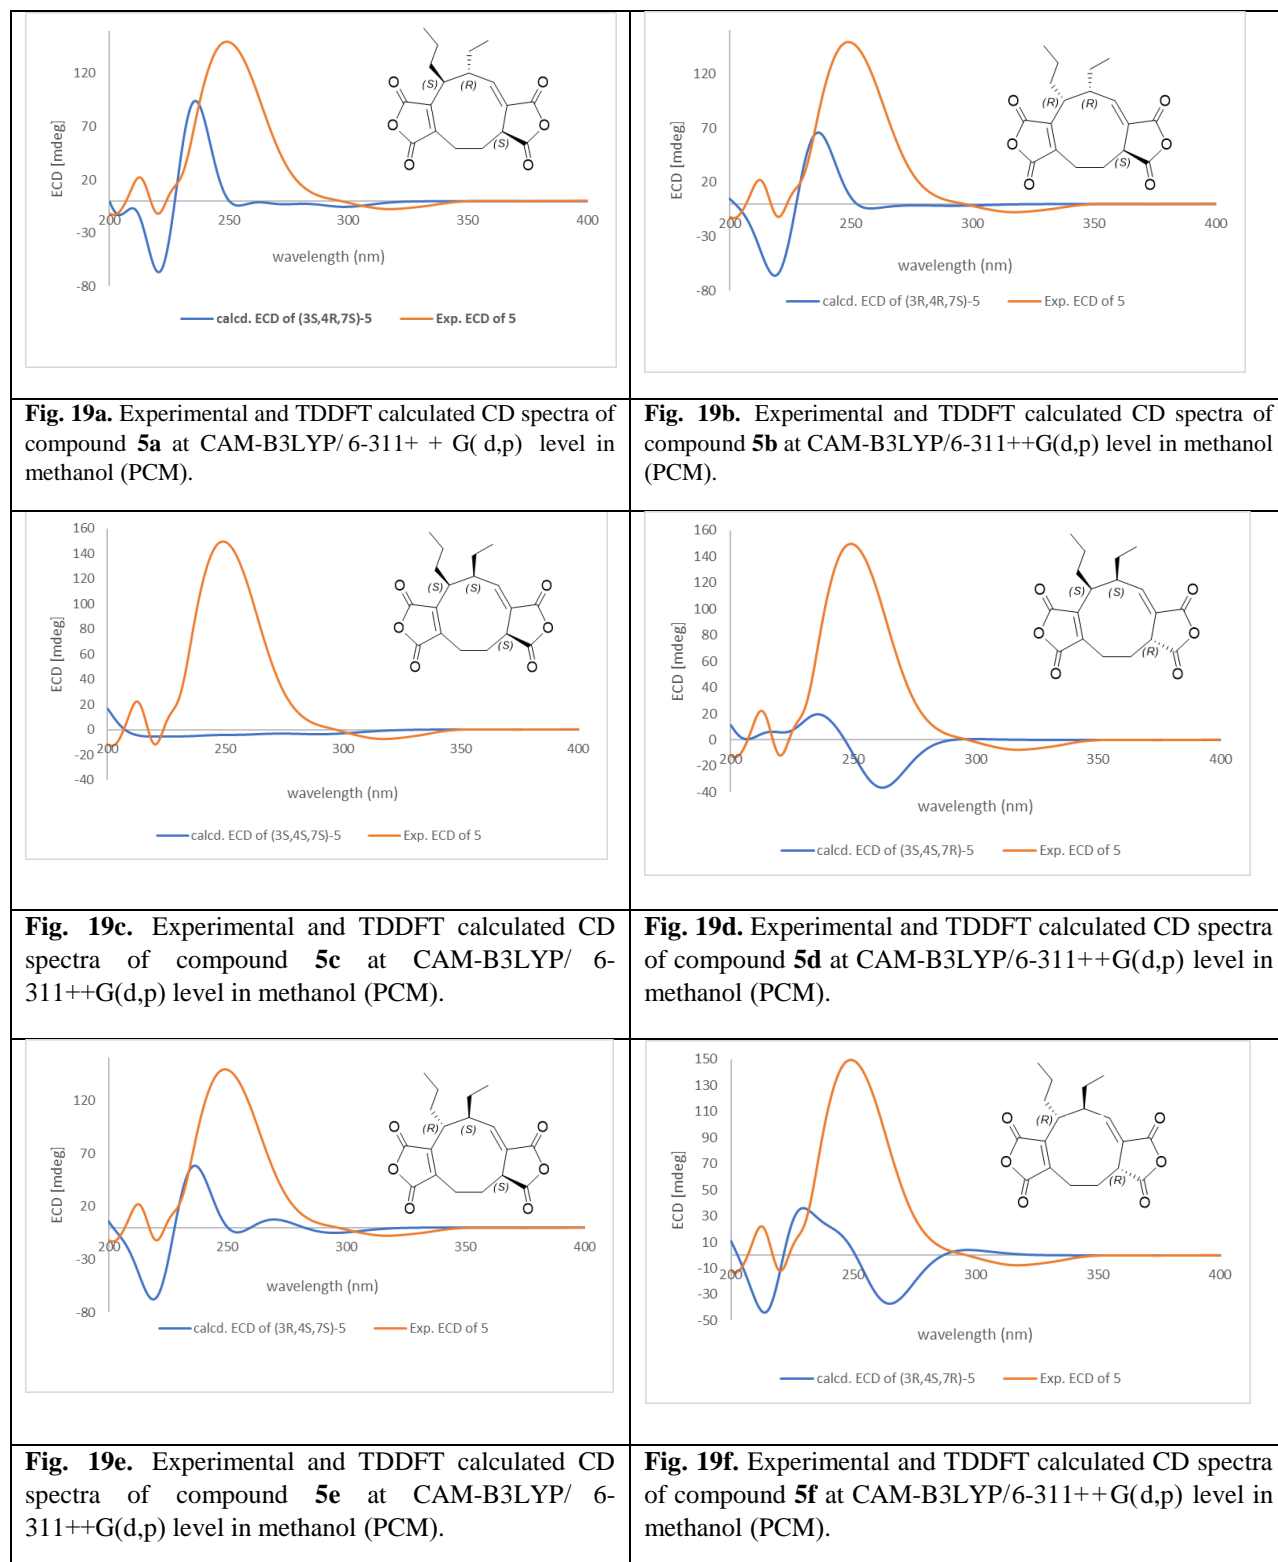

**Figure S19.** ECD spectra of compounds **5a-5f** compare with experimental ECD compound **5**.
